# Supplementary material for: Deep Learning Powered Identification of Differentiated Early Mesoderm Cells from Pluripotent Stem Cells
Source: MDPI journal article supplement (doi:10.3390/cells13060534), 2024-03-18
Supplement: s1 [file s1]

**Supplementary Materials**

**for**

**Deep Learning Powered Identification of  
Differentiated Early Mesoderm cells from Pluripotent  
Stem Cells**

Sakib Mohammad, Arpan, Roy, Andreas  
Karatzas, Sydney L. Sarver, Iraklis  
Anagnostopoulos, Farhan Chowdhury\*

\*Correspondence: [farhan.chowdhury@siu.edu](mailto:farhan.chowdhury@siu.edu)

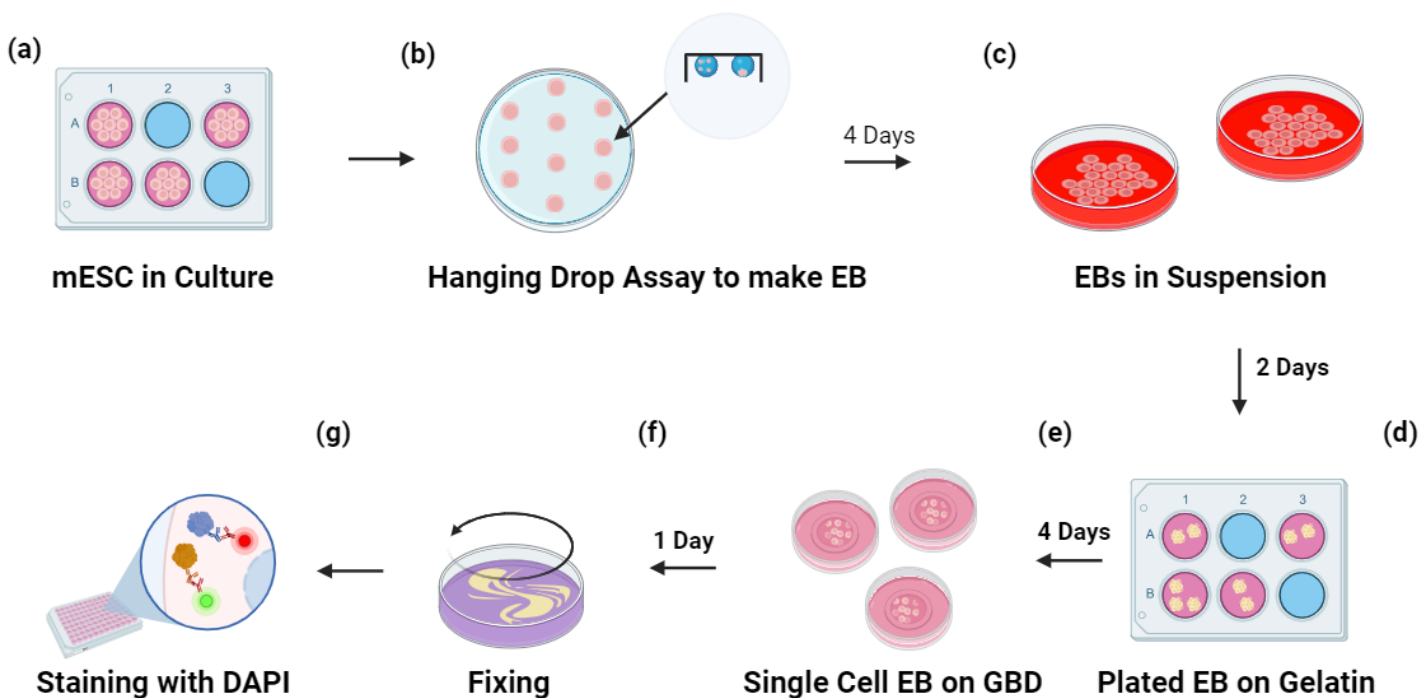

Figure S1. Cell culture workflow, detailing the steps from culturing ESC to immunostaining. (a) mESC culture in 6-well plate. (b) Hanging drop assay to make EB from ESC. (c) EBs cultured in suspension allowing them to grow. (d) Culturing EBs in 6-well plate coated with gelatin. (e) Single cell EBs on glass-bottom dishes to initiate fixing and staining procedures. (f) Fixing EBs with PFA. (g) Immunostaining with DAPI.

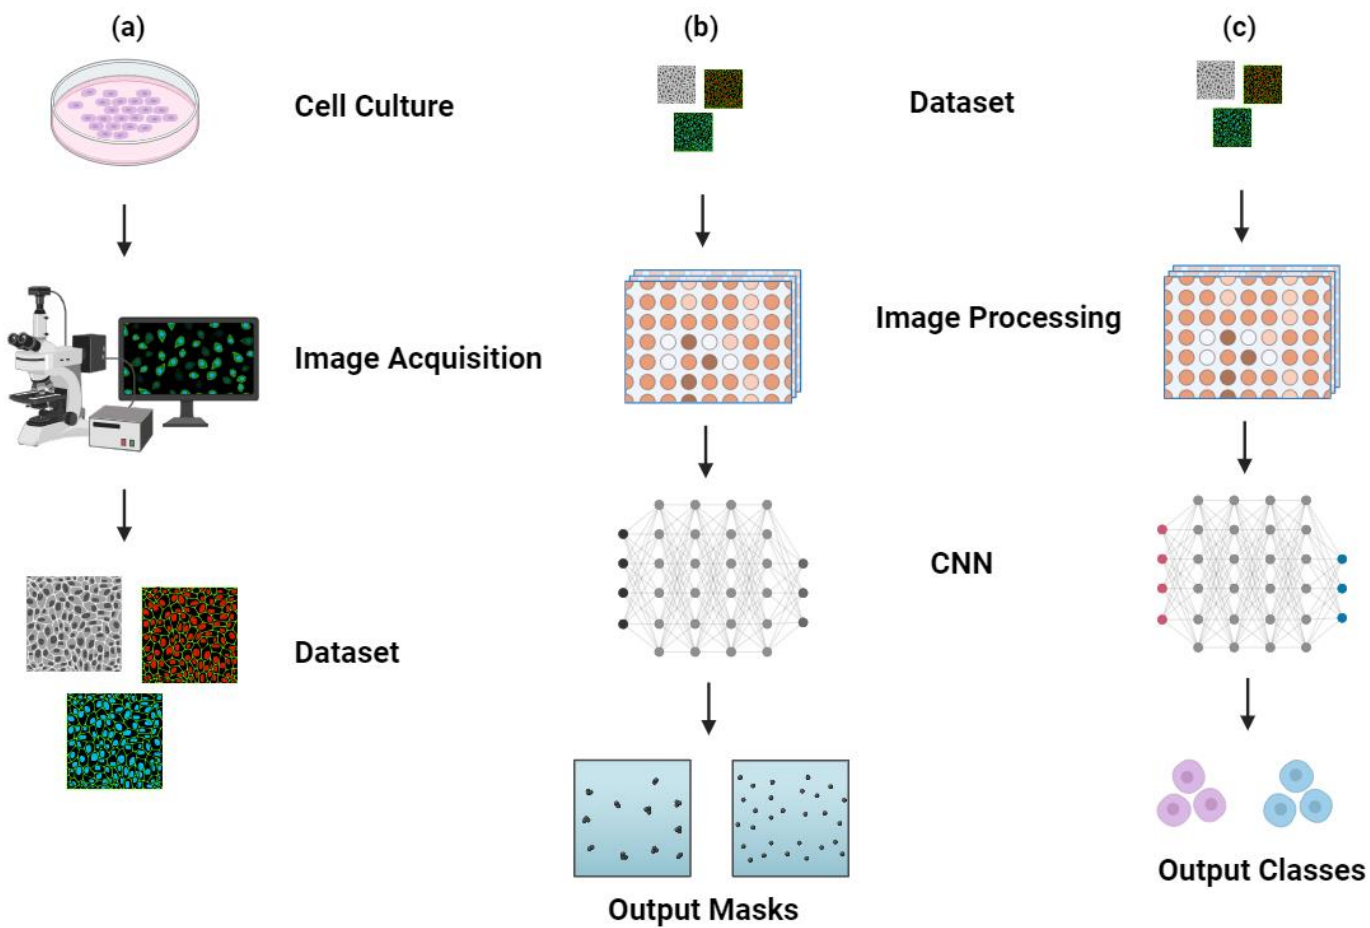

Figure S2. Our laboratory and computation-based workflow. (a) Cell culture related and image acquisition. (b) Segmentation workflow (c) Classification workflow.

# U-Net Phase Patches

Phase Patch 1

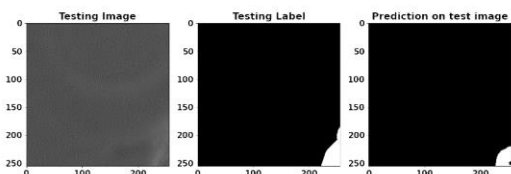

Phase Patch 2

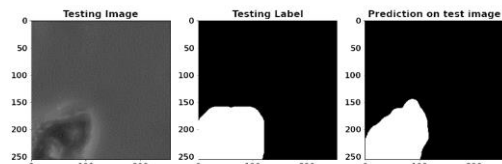

Phase Patch 3

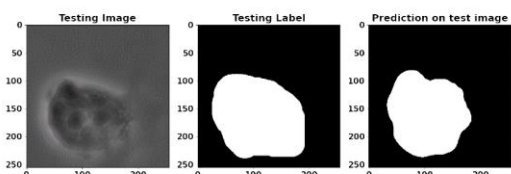

Phase Patch 4

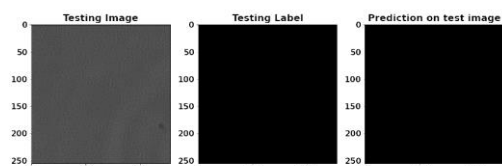

Phase Patch 5

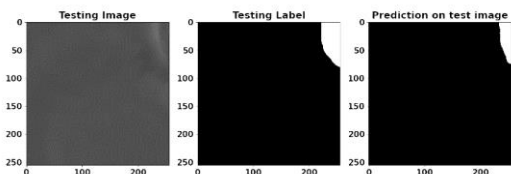

Phase Patch 6

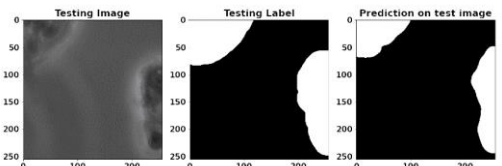

Phase Patch 7

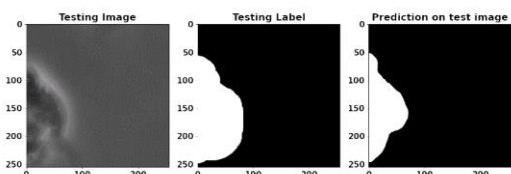

Phase Patch 8

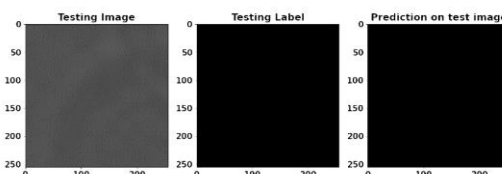

Figure S3. The phase-contrast images, ground truth masks, and predicted masks by the segmentation model U-Net are shown here.

# U-Net      Nuclei Patches

Nucleus Patch 1

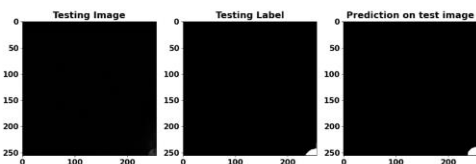

Nucleus Patch 3

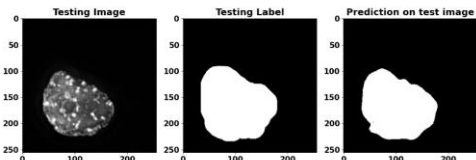

Nucleus Patch 5

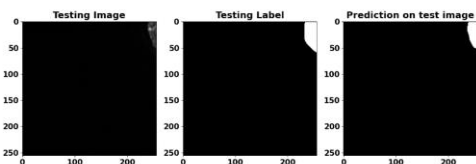

Nucleus Patch 7

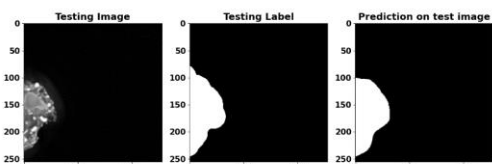

Nucleus Patch 2

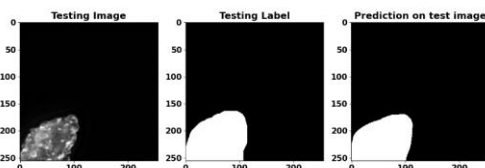

Nucleus Patch 4

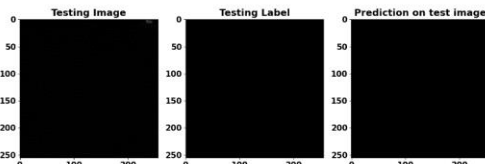

Nucleus Patch 6

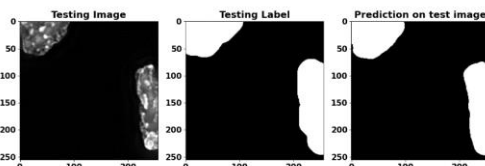

Nucleus Patch 8

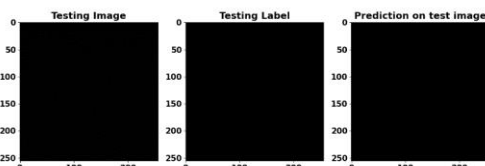

Figure S4. The nuclei images, ground truth masks, and predicted masks by the segmentation model U-Net are presented here.

(a)

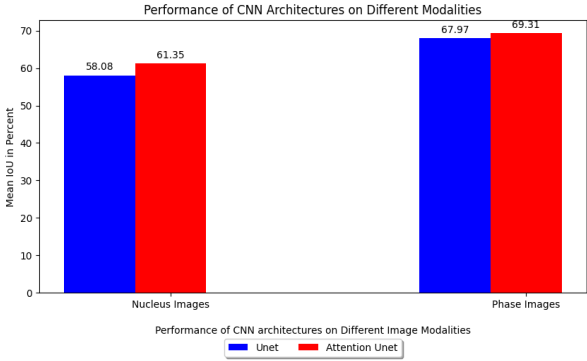

(b)

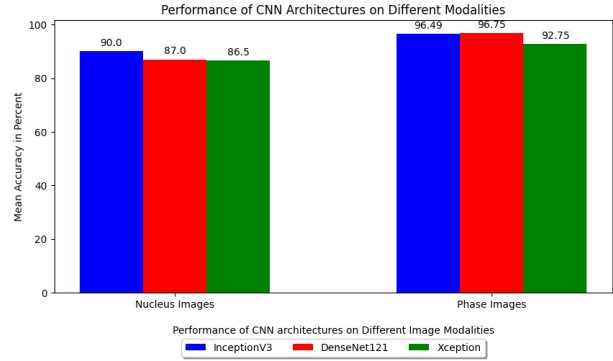

Figure S5. Performance comparison of the CNN models. (a) Mean IoU comparison for nuclei and phase images between U-Net and Attention U-Net segmentation models. (b) Accuracy comparison for nuclei and phase images among InceptionNetV3, DenseNet121 and Xception classification models.

**2**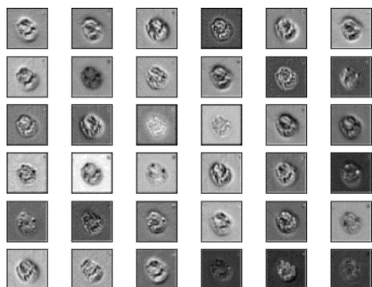**3**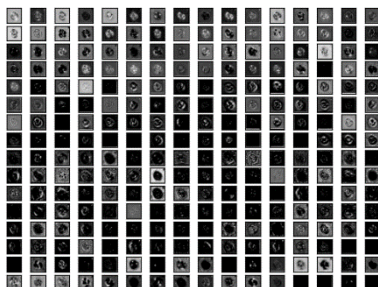**4**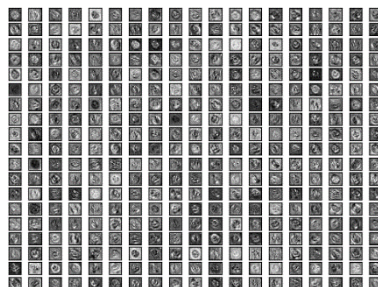**5**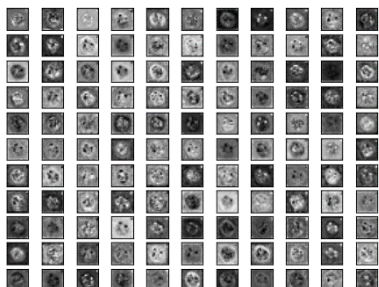**6**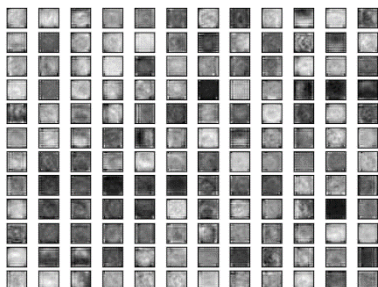**7**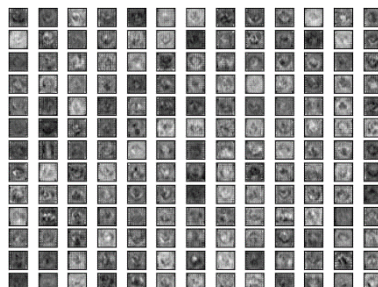**8**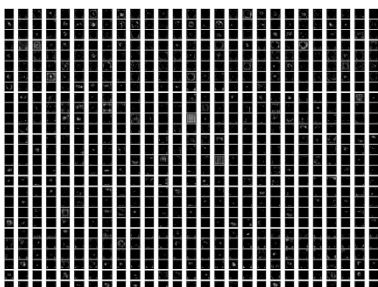

Figure S6. Features extracted from the Inception blocks 2-8 of InceptionV3 CNN model are visualized for a phase-contrast image.



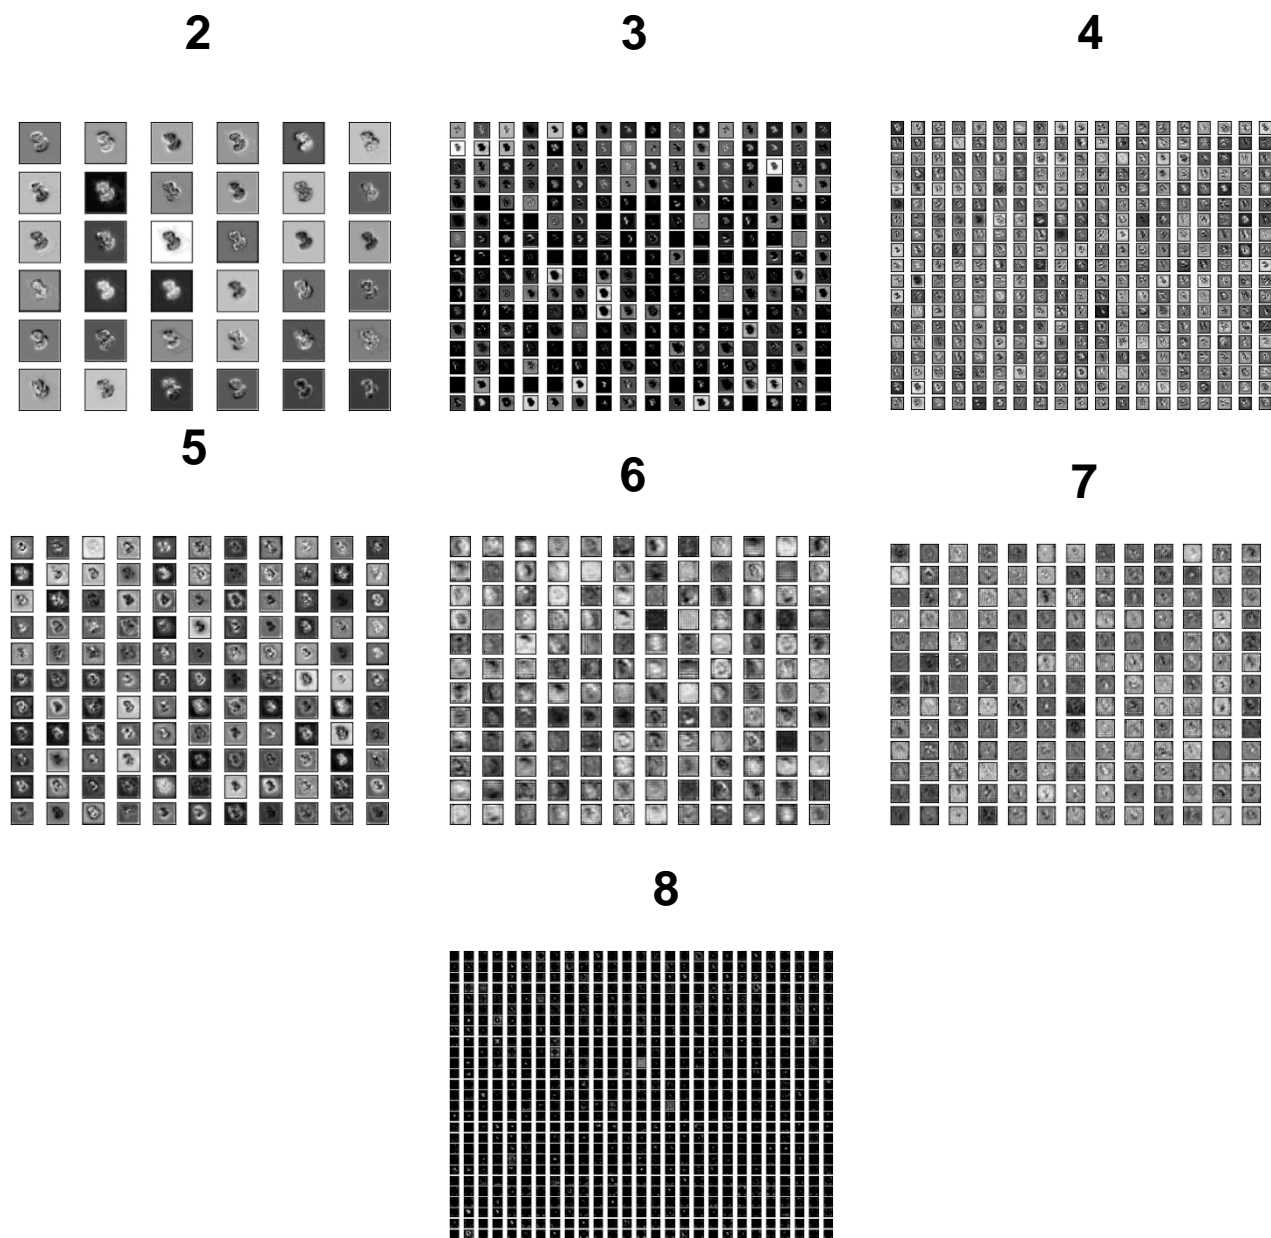

Figure S7. Features extracted from the Inception blocks 2-8 of InceptionV3 CNN model are visualized for a nucleus image.



Table S1. Image distribution for segmentation.

| Image Type                         | Number |
|------------------------------------|--------|
| 2048*2048 Phase images             | 25     |
| 2048*2048 Nucleus images           | 25     |
| 2048*2048 Mesoderm images          | 25     |
| 2048*2048 Phase image masks        | 25     |
| 2048*2048 Nucleus image masks      | 25     |
| 256*256 Phase image patches        | 1600   |
| 256*256 Nucleus image patches      | 1600   |
| 256*256 Phase image mask patches   | 1600   |
| 256*256 Nucleus image mask patches | 1600   |

Table S2. Augmentation parameters before training.

| Augmentation    | Range |
|-----------------|-------|
| Random Rotation | 20    |
| Width Shift     | 0.15  |
| Height Shift    | 0.2   |
| Random Shear    | 0.2   |
| Random Zoom     | 0.15  |
| Horizontal Flip | Yes   |
| Vertical Flip   | Yes   |

Table S3. Augmentation parameters during training.

| <b>Augmentation</b> | <b>Range</b> |
|---------------------|--------------|
| Random Rotation     | 90           |
| Width Shift         | 0.3          |
| Height Shift        | 0.3          |
| Random Shear        | 0.5          |
| Random Zoom         | 0.3          |
| Horizontal Flip     | Yes          |
| Vertical Flip       | Yes          |
